# Supplementary material
Source: PubMed Central journal article supplement (PMC3633817)

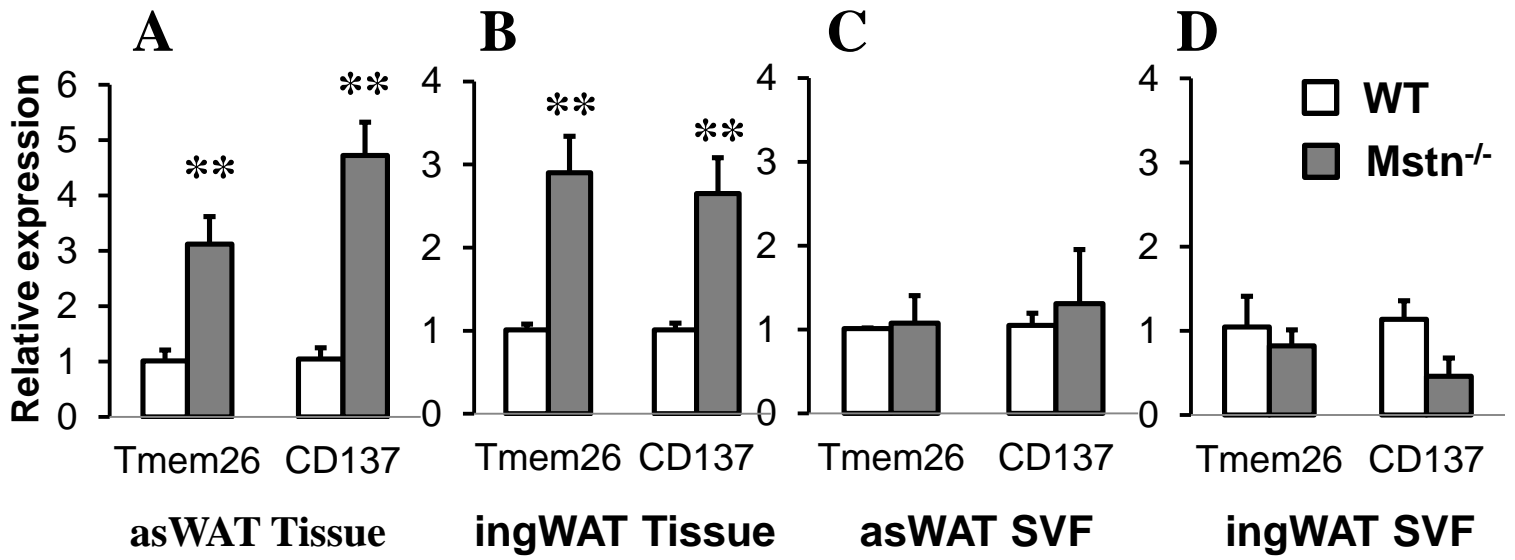

Supplemental Figure S2

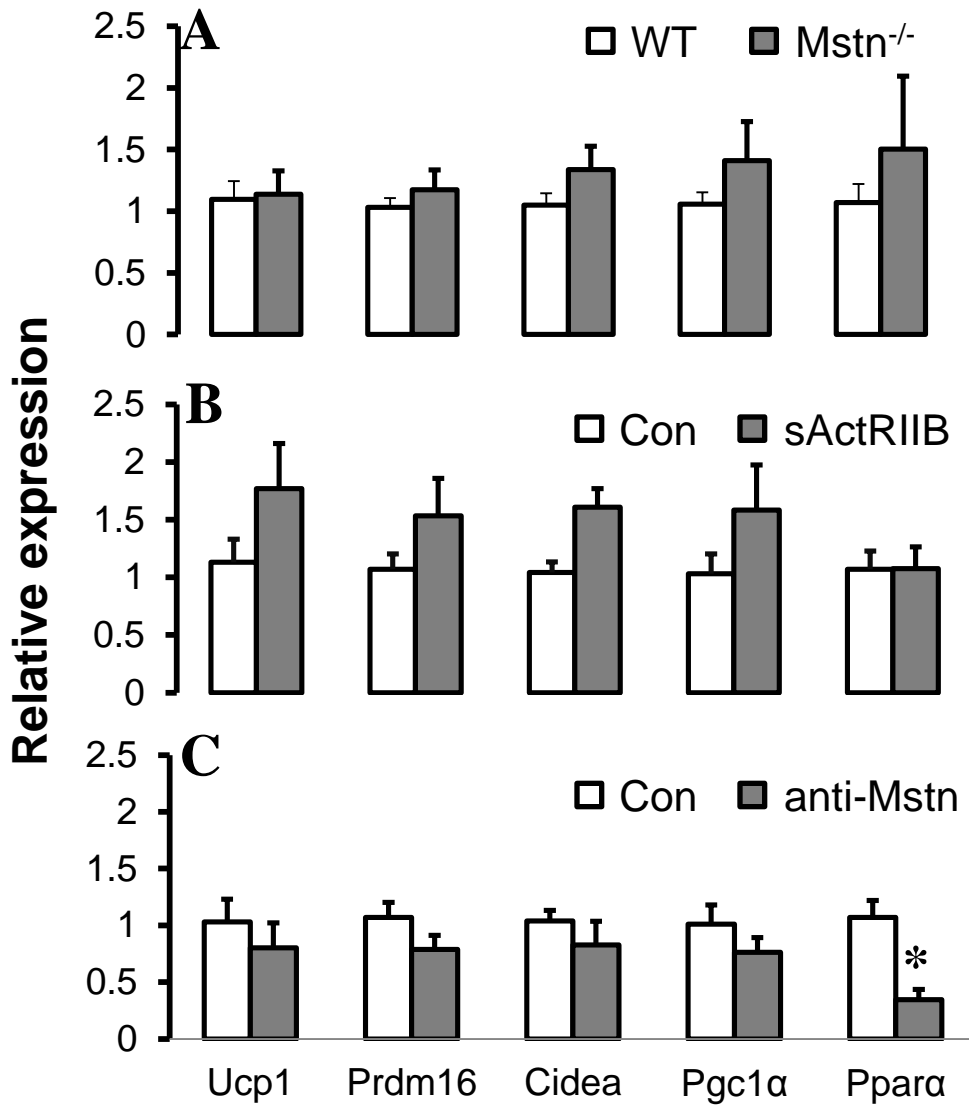

Supplement: supp_fj.12-225755_12-225755SuppData.pdf [file supp_fj.12-225755_12-225755SuppData.pdf]
